# Supplementary material for: Thermodynamically programmed one-pot CRISPR platform for point-of-care SNP genotyping
Source: Research Square preprint supplement (doi:10.21203/rs.3.rs-8802024/v1), 2026-02-17
Supplement: Supplementary file 1 [file 310093104f8b966f6bcb20f0.docx]

Supplementary Materials

**Thermodynamically programmed one-pot CRISPR platform for point-of-care SNP genotyping**

Xiaolong Wu1 †, Yanan LI 1 †, Yumeng Cao1, Zibin Zhao1, Hongyu Lu1, Shaochong Liang1, and I-Ming Hsing1*

1 Department of Chemical and Biological Engineering, The Hong Kong University of Science and Technology, Clear Water Bay, Hong Kong SAR, China.

* To whom correspondence should be addressed. Email: kehsing@ust.hk

† These authors contributed equally to this work.

**Table of Contents**

Fig. S1. Secondary structure analysis and FP/FPP ratio optimization for different targets. 3

Fig. S2. RPA validation of parallel amplification tracks using different primer combinations. 4

Fig. S3. Real-time RPA amplification kinetics under different primer configurations. 5

Fig. S4. PAM-dependent activation of Cas12a in the CRISPR assay. 6

Fig. S5. Python-based simulation of TEMPO systems using different primer sets. 7

Fig. S6. Relocating the targeting site via primer engineering in the HIV DNA target. 9

Fig. S7. Analytical sensitivity of the HIV TEMPO assay. 10

Fig. S8. Quantitative PCR benchmark for HIV sensitivity. 11

Fig. S9. Detection specificity of the HIV TEMPO assay. 12

Fig. S10. Design, fabrication and validation of the microfluidic SNP chip. 13

Fig. S11. Sensitivity and SNP discrimination for rs199476104 in tube-based assays. 14

Fig. S12. Compatibility of direct lysis buffer with the TEMPO amplification reaction. 15

Fig. S13. TEMPO CRISPR detection following direct lysis of human samples. 16

Fig. S14. Optimization of lyoprotectants for lyophilized TEMPO reaction system toward point-of-care use. 17

Fig. S15. Tube-based TEMPO reactions for real-sample analysis. 18

Fig. S16. Design and validation of a dual-target microfluidic SNP chip 19

Fig. S17. Lyophilization and reconstitution in microfluidic chip. 20

Fig. S18. Microfluidic chip–based fluorescence readout for representative samples. 21

Table S1: Sequences used in this study. 23

Table S2. Composition of the TEMPO system. 28

Table S3. Lyophilization formulation of the TEMPO system. 29

Table S4. TEMPO-based detection results for 20 human SNP samples. 30

Supplementary Note 1: Ordinary Differential Equations (ODEs) 35

References 39


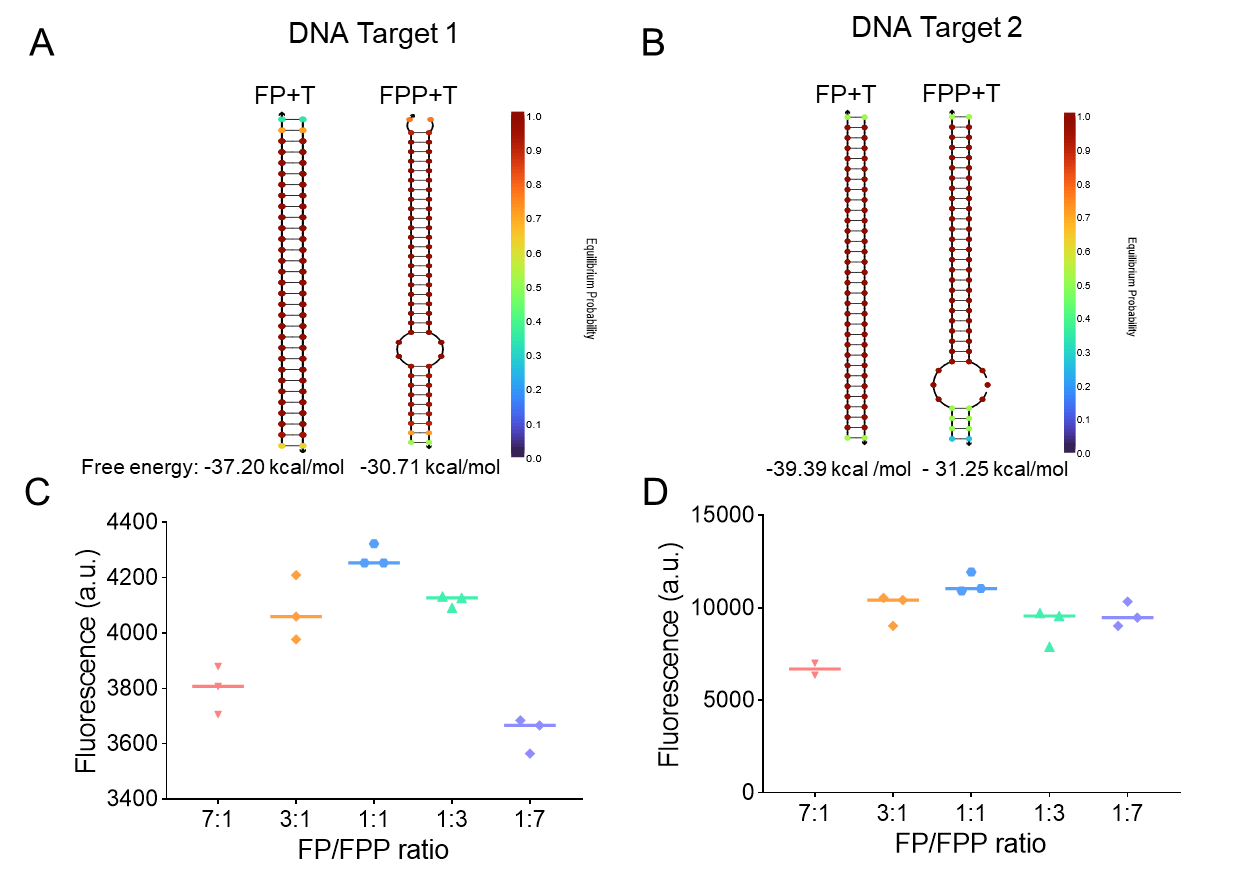


## Fig. S1. Secondary structure analysis and FP/FPP ratio optimization for different targets.

(A and B) Secondary structure and hybridization-energy analysis of the forward primer (FP) and its corresponding template (T) for target 1 (HIV) (A) and target 2 (rs199476104) (B), predicted using NUPACK. Predicted base-pairing probabilities and structural features highlight differences in primer–template interactions across targets. (C and D) Optimization of the FP/FPP primer ratio for target 1 (HIV) (C) and target 2 (rs199476104) (D). Reactions were conducted with an input template concentration of 1 fM. Fluorescence responses across different FP/FPP ratios identify target-dependent optimal primer compositions.


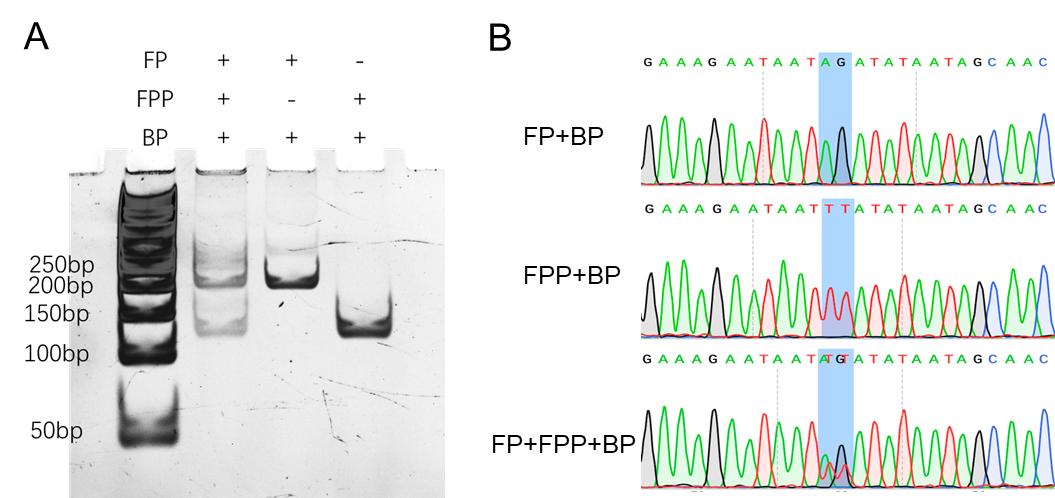


## Fig. S2. RPA validation of parallel amplification tracks using different primer combinations.

Polyacrylamide gel electrophoresis (PAGE) analysis (A) and Sanger sequencing results (B) of RPA amplification products generated using different primer combinations (FP + BP, FPP + BP, and FP + FPP + BP) with HIV as the target sequence. Distinct band patterns observed by PAGE, together with sequence verification by Sanger sequencing, confirm the formation of specific amplification products corresponding to different primer sets. These RPA assays support the presence of two parallel amplification tracks enabled by primer design.


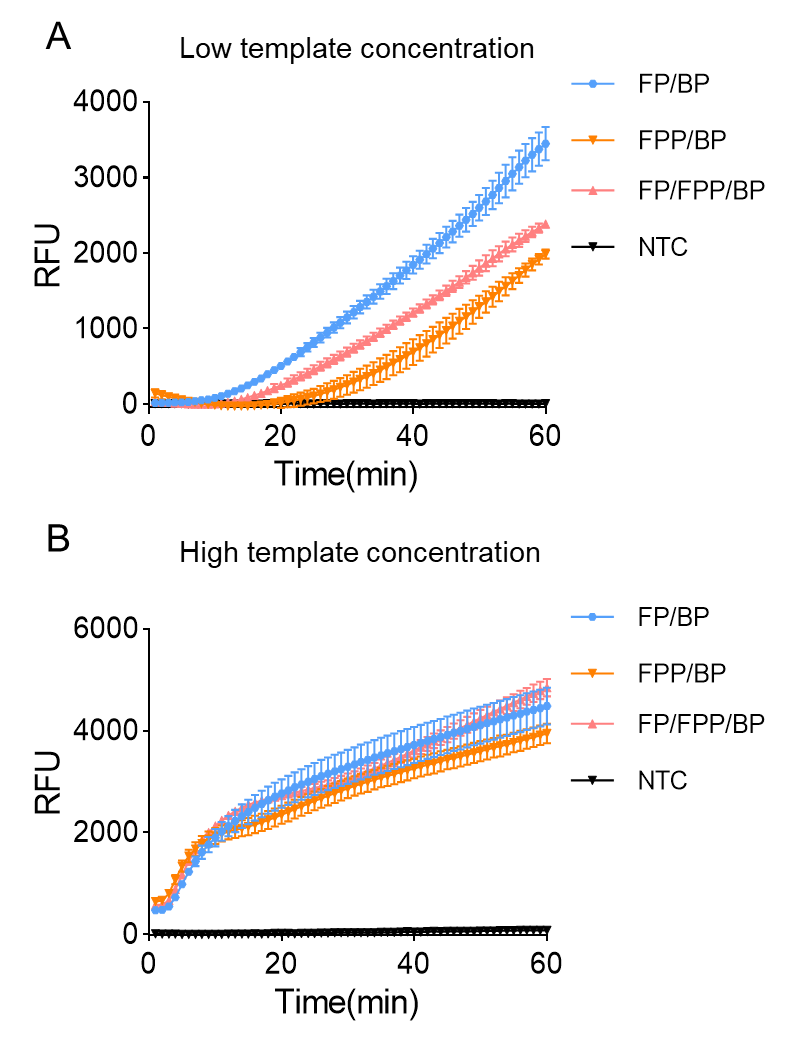


## Fig. S3. Real-time RPA amplification kinetics under different primer configurations.

Real-time fluorescence kinetics of recombinase polymerase amplification (RPA) reactions were monitored using SYTO 82 (1 μM) as a fluorescent DNA-binding dye, with signals recorded in the HEX channel. (A) Low-template condition with an input template concentration of 50 aM. (B) High-template condition with an input template concentration of 50 fM. NTC denotes the no-template control. n = 3 technical replicates; error bars indicate mean ± s.d.

Real-time amplification kinetics illustrate how the encoded thermodynamic hierarchy among primer sets manifests as distinct reaction rates. Under low-template conditions, FP-driven amplification proceeds more rapidly, whereas FPP-driven amplification accumulates more slowly, consistent with reduced hybridization affinity. Reactions containing both primers (FP + FPP) display intermediate kinetics, indicative of delayed FPP engagement rather than a threshold-triggered transition. At higher template concentrations, these kinetic differences are attenuated, consistent with mass-action effects mitigating mismatch-associated penalties.


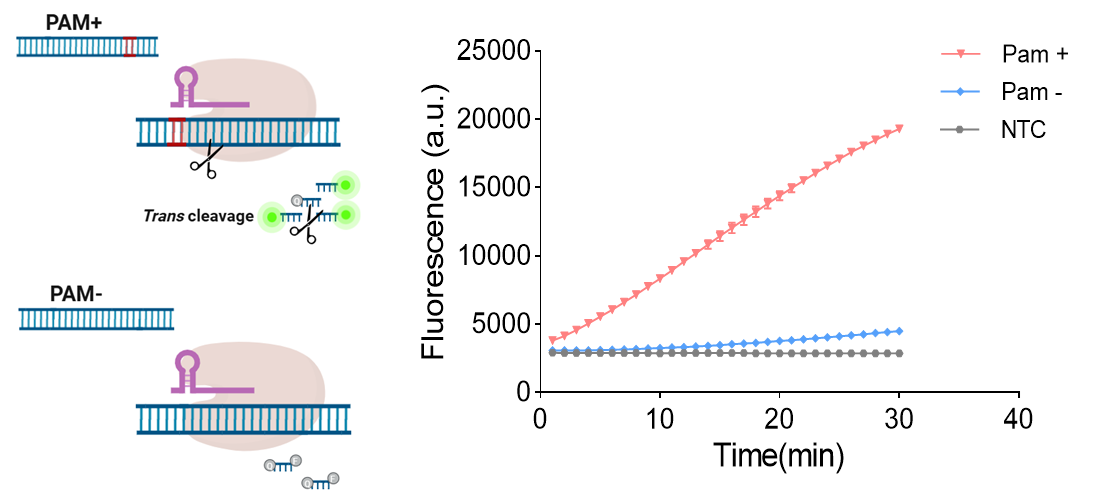


## Fig. S4. PAM-dependent activation of Cas12a in the CRISPR assay.

CRISPR assays were performed using template sequences either containing a protospacer adjacent motif (PAM ⁺) or lacking a PAM site (PAM ⁻). In the PAM ⁺ condition, Cas12a–crRNA complexes efficiently recognized the target and became activated, resulting in robust trans-cleavage of the ssDNA reporter and strong fluorescence signals after incubation at 37 °C. In contrast, templates lacking a PAM sequence (PAM ⁻) induced minimal Cas12a activation and produced only weak fluorescence output. These results demonstrate that the presence of a PAM site in the template is essential for efficient CRISPR activation and reporter signal generation.


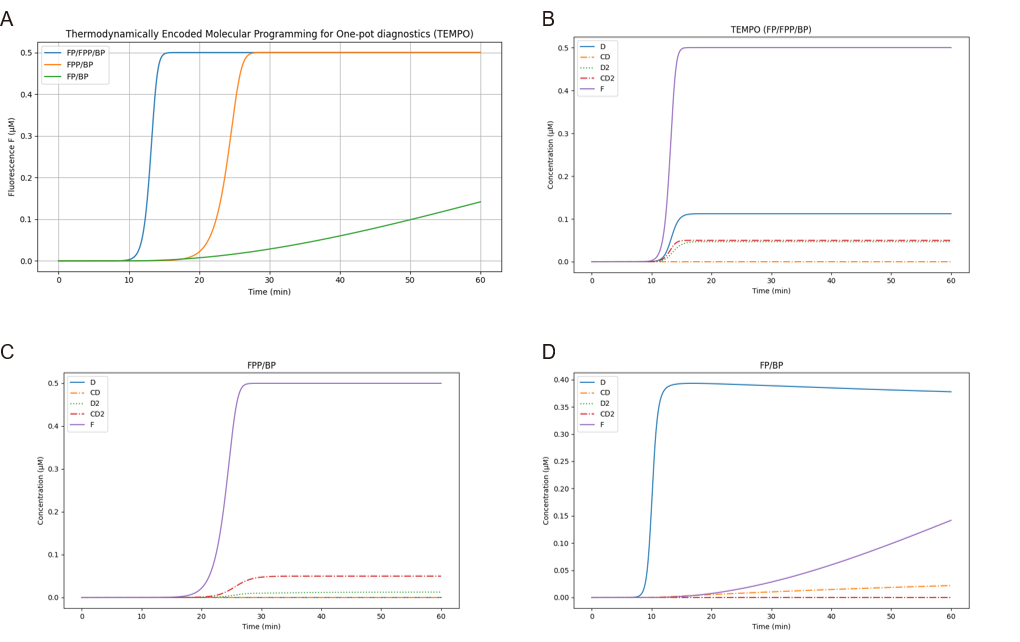


## Fig. S5. Python-based simulation of TEMPO systems using different primer sets.

A system of ordinary differential equations (ODEs) was implemented in Python to simulate the reaction kinetics of the TEMPO assay under experimentally matched conditions. Primer and template concentrations were set to FP = 200 nM, FPP = 200 nM, BP = 400 nM, and target DNA (D) = 1 fM. Kinetic parameters (𝑘cat and Km) for LbCas12a were adopted from previously reported literature1. Primer–template binding and extension were modeled using a uniform rate constant for fully complementary interactions (0.1 μM⁻¹ s⁻¹), while mismatched primer binding (e.g., FPP binding to ST templates) was assigned a reduced rate constant (0.08 μM⁻¹ s⁻¹). Cas12a–crRNA activation and trans-cleavage efficiencies were modeled as strongly PAM-dependent, with substantially higher activity in the presence of a PAM sequence. FP denotes the upstream forward primer lacking a PAM, FPP denotes the PAM-introducing forward primer, BP denotes the backward primer, D denotes the original PAM-free template, and D2 denotes PAM-containing amplicons generated via FPP-mediated amplification. CD and CD2 represent CRISPR complexes bound to D and D2 amplicons, respectively, and F denotes cleaved fluorescent reporters. (**A**) Simulated fluorescence output (F) of the TEMPO system using different primer combinations.

(**B**) Time-resolved concentration profiles of key molecular species in reactions containing FP, FPP, and BP, where both PAM-free (D) and PAM-containing (D2) amplicons are generated, enabling concurrent amplification and CRISPR signal transduction. (**C**) Time-resolved concentration profiles of key molecular species in reactions containing FPP and BP only, in which PAM-containing amplicons (D2) are produced and concurrently consumed by Cas12a, resulting in attenuated amplification dynamics. (**D**) Time-resolved concentration profiles of key molecular species in reactions containing FP and BP only, where rapid accumulation of PAM-free amplicons (D) fails to efficiently activate Cas12a, yielding minimal fluorescence output.


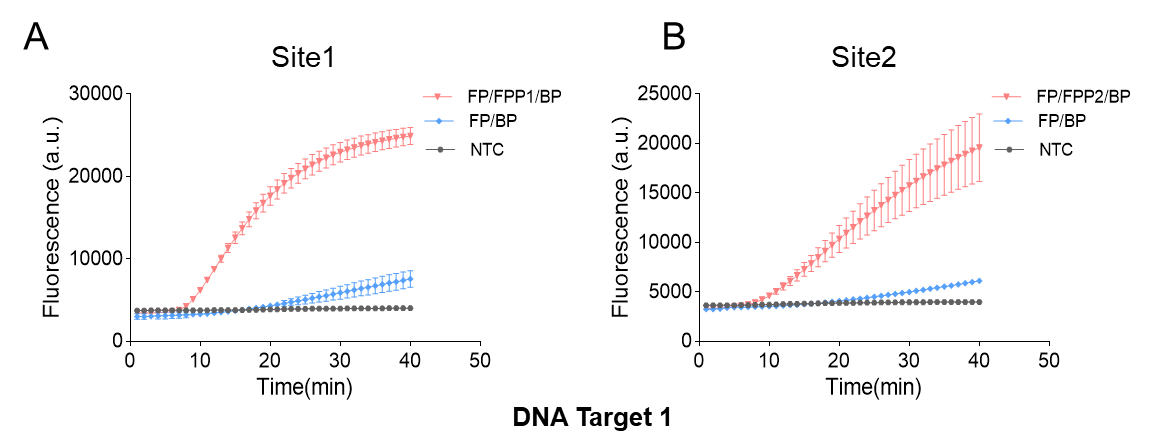


## Fig. S6. Relocating the targeting site via primer engineering in the HIV DNA target.

Targeting site relocation was achieved by introducing forward primers encoding alternative targeting sites within the HIV DNA target. Real-time amplification kinetics were monitored at an input concentration of 1 fM. (A) Amplification curves obtained using the pristine forward primer or the engineered primer FPP1 targeting site 1. The pristine primer initiates amplification earlier, whereas FPP1 exhibits a delayed onset, consistent with reduced primer–template binding affinity. (B) Amplification curves obtained using the pristine forward primer or the engineered primer FPP2 targeting site 2. A similarly delayed and sequential onset of amplification is observed, demonstrating that primer engineering enables programmable relocation of the targeting site without disrupting amplification fidelity. Data represent n = 3 technical replicates, with error bars indicating mean ± s.d.


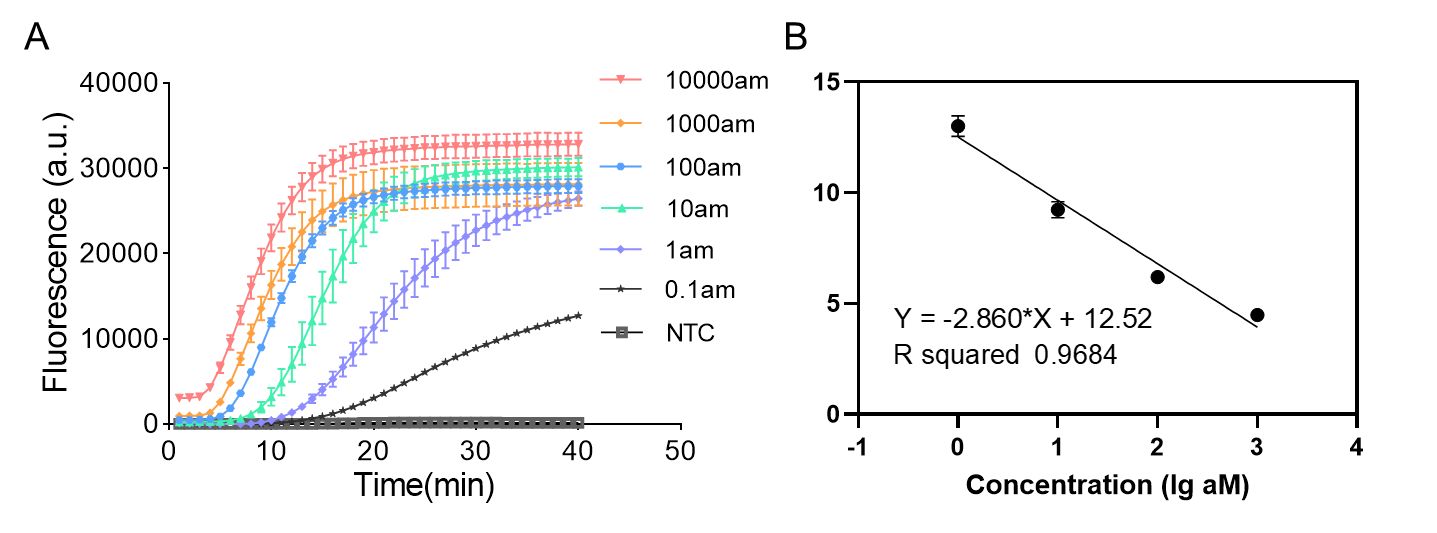


## Fig. S7. Analytical sensitivity of the HIV TEMPO assay.

(A) Real-time fluorescence amplification curves obtained using serially diluted HIV target DNA inputs (10,000 aM, 1,000 aM, 100 aM, 10 aM, 1 aM, and 0.1 aM). Higher target concentrations produced earlier fluorescence onset and faster signal accumulation, whereas lower concentrations exhibited delayed amplification kinetics. (B) Corresponding standard curve derived from the amplification kinetics across the tested concentration range. NTC: no-template control. Data represent n = 3 technical replicates, with error bars indicating mean ± s.d.


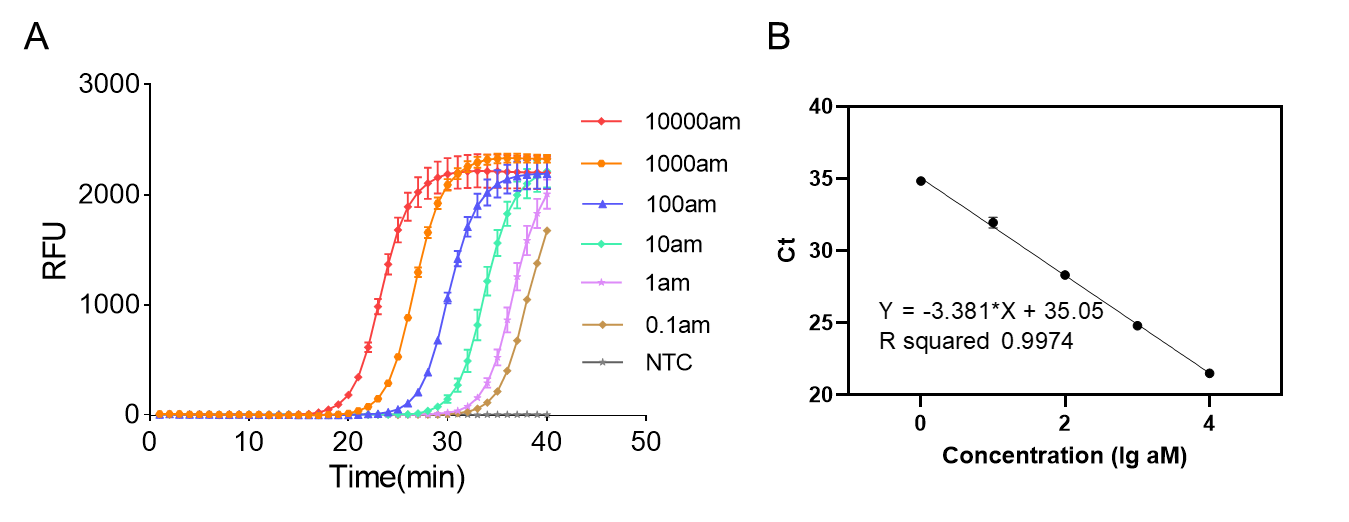


## Fig. S8. Quantitative PCR benchmark for HIV sensitivity.

Quantitative PCR (qPCR) was performed as a reference method to benchmark the analytical sensitivity of HIV detection. (A) Representative real-time fluorescence amplification curves obtained by qPCR across a series of HIV target concentrations (10000am, 1000am, 100am, 10am, 1am, 0.1am). NTC: no-template control. Data represents n = 3 technical replicates, with error bars indicating mean ± s.d. (B) Corresponding cycle threshold (Ct) values derived from the qPCR amplification curves, enabling quantitative comparison across input concentrations.

## Fig. S9. Detection specificity of the HIV TEMPO assay.

The specificity of the HIV TEMPO assay was evaluated using non-target DNA templates, including ND6, HPV16, HPV18 plasmids, and a synthetic DNA sequence absent from natural genomes, with a no-template control (NTC) included as a negative control. All templates were tested at an input concentration of 1 fM. The assay generated a strong fluorescence signal exclusively in the presence of the target HIV template, whereas non-target natural and synthetic DNAs produced only background-level signals comparable to the NTC. n = 3 technical replicates; error bars indicate mean ± s.d. These results demonstrate the high specificity of the TEMPO system, with selective activation occurring only for the intended target sequence.


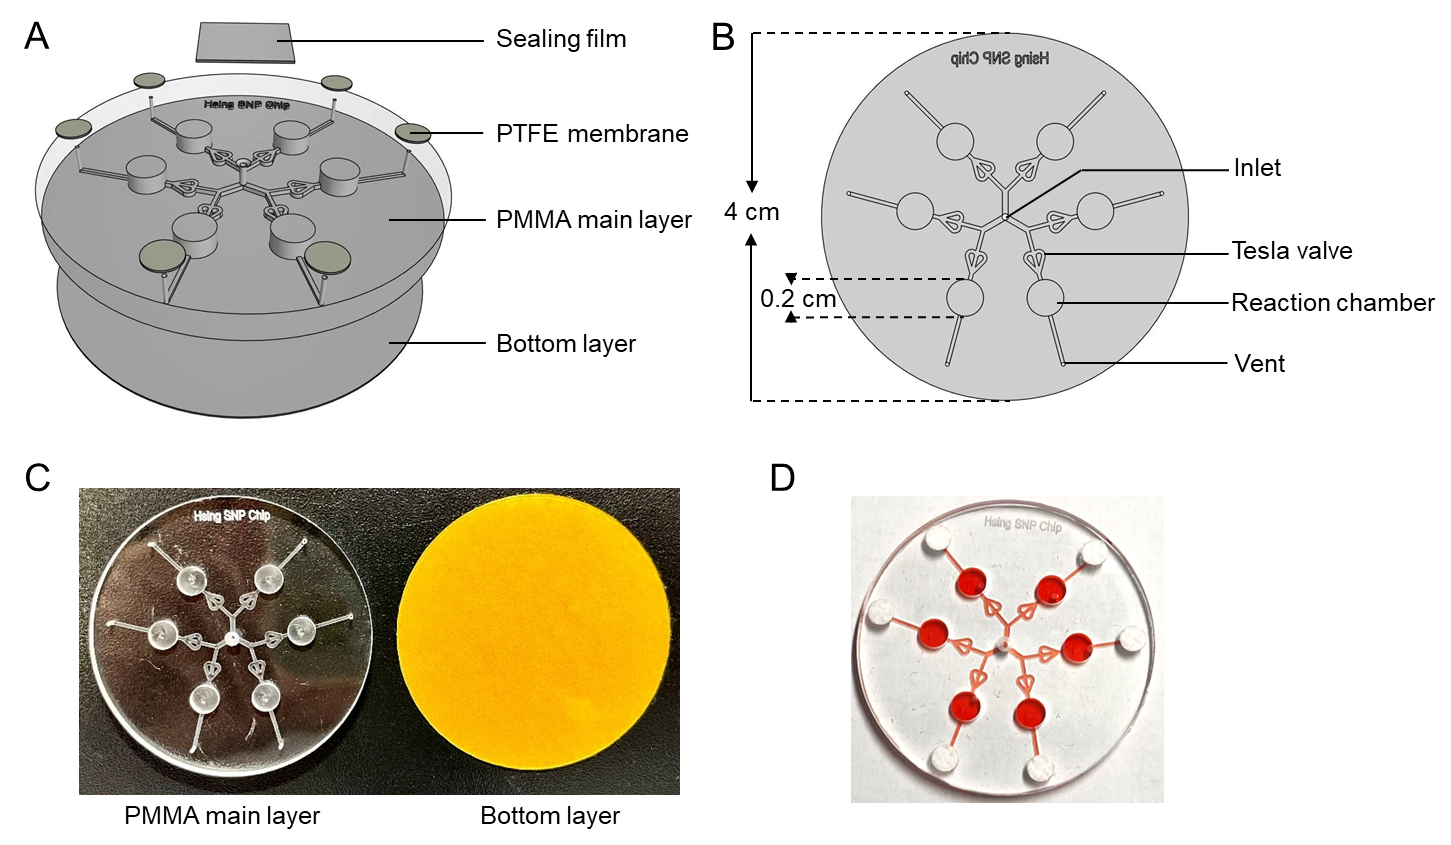


## Fig. S10. Design, fabrication and validation of the microfluidic SNP chip.

(A) Schematic illustration of the overall microfluidic chip architecture. The chip comprises four vertically stacked layers from bottom to top: a single-sided adhesive film for channel sealing, a PMMA microfluidic channel layer, a hydrophobic PTFE vent membrane that permits gas exchange while preventing liquid leakage, and a top single-sided adhesive film used to seal the sample inlet. (B) Bottom-view design of the PMMA microfluidic channel layer integrating three independent SNP targets in a six-channel architecture. The circular chip (4 cm in diameter) incorporates a central sample inlet, Tesla-type valve microstructures for passive flow regulation, radially distributed reaction chambers, and air vents, enabling controlled fluid handling and reaction compartmentalization. (C) Photograph of the PMMA channel layer and the bottom single-sided adhesive film prior to assembly. (D) Photograph of the fully assembled microfluidic chip filled with red dye to validate channel integrity and connectivity.


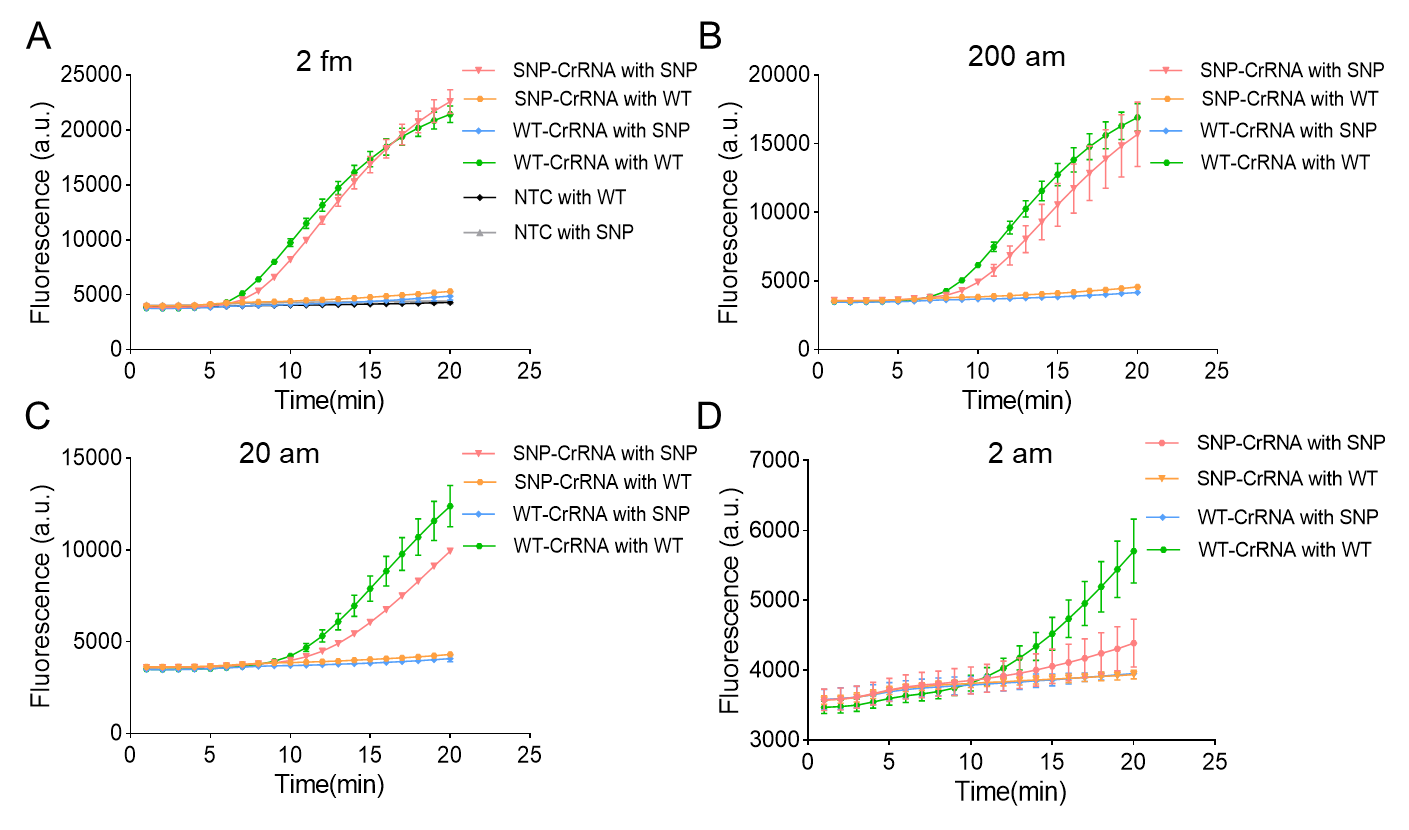


## Fig. S11. Sensitivity and SNP discrimination for rs199476104 in tube-based assays.

Real-time fluorescence kinetics of WT and SNP targets at the rs199476104 locus. Reactions were carried out in test tubes using serially diluted target DNA inputs of 2 fM (A), 200 aM (B), 20 aM (C), and 2 aM (D). WT and SNP alleles exhibited distinct amplification kinetics across all concentrations, reflected by separable fluorescence trajectories over time. NTC denotes no-template controls. n = 3 technical replicates; error bars indicate mean ± s.d.


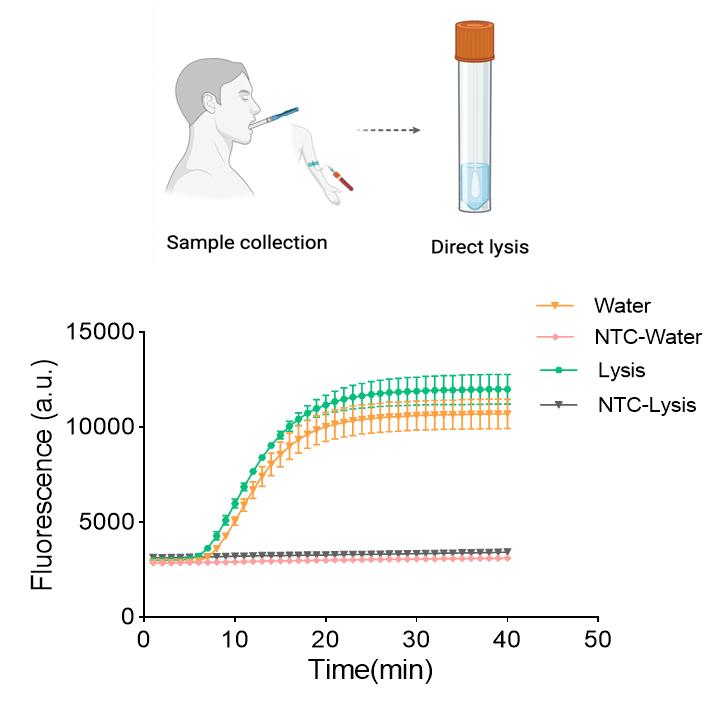


## Fig. S12. Compatibility of direct lysis buffer with the TEMPO amplification reaction.

Schematic of sample collection followed by direct lysis (top) and real-time fluorescence kinetics of the TEMPO reaction in the presence of lysis buffer (bottom). Reactions were performed with a 1 fM input template. Two no-template controls (NTC–water and NTC–lysis buffer) remained at baseline throughout the assay, while comparable amplification kinetics were observed with and without lysis buffer, indicating that direct lysis does not interfere with reaction performance. n = 3 technical replicates; error bars indicate mean ± s.d.


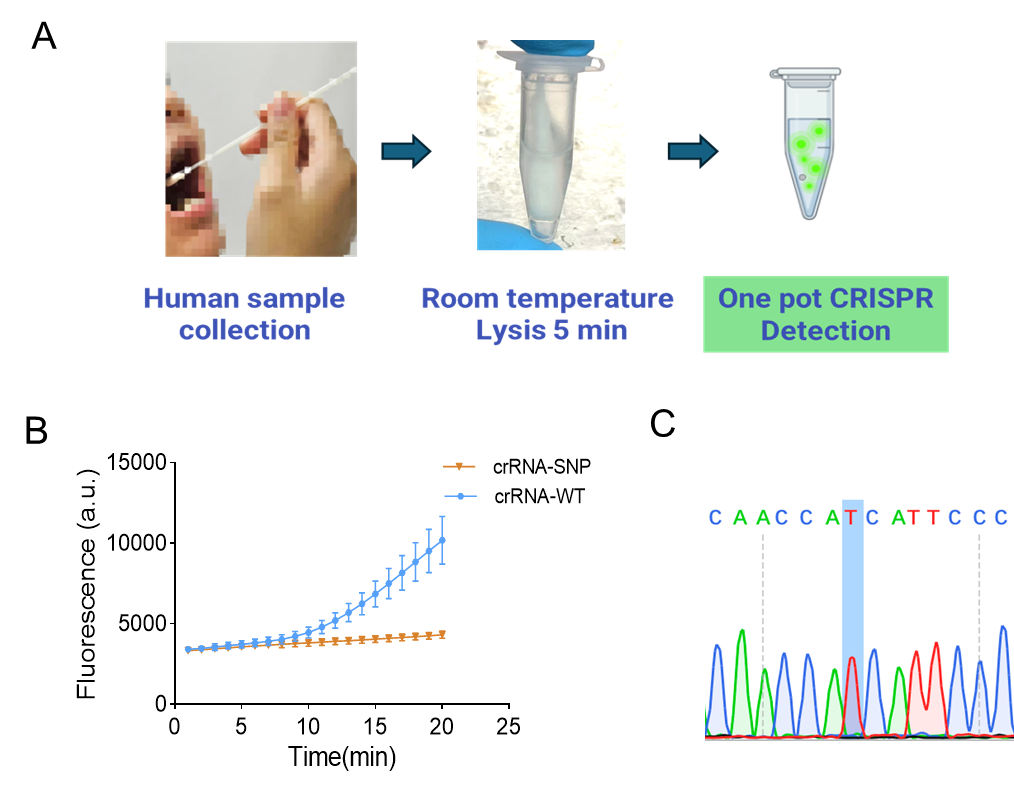


## Fig. S13. TEMPO CRISPR detection following direct lysis of human samples.

Schematic illustration of the workflow for TEMPO CRISPR detection following direct lysis of human samples (A). Human samples were collected, lysed at room temperature for 5 min, and directly introduced into the one-pot CRISPR reaction without nucleic acid purification. Real-time fluorescence kinetics demonstrate successful target amplification and detection after direct lysis (B). Sanger sequencing confirms the identity of the amplified target (C).


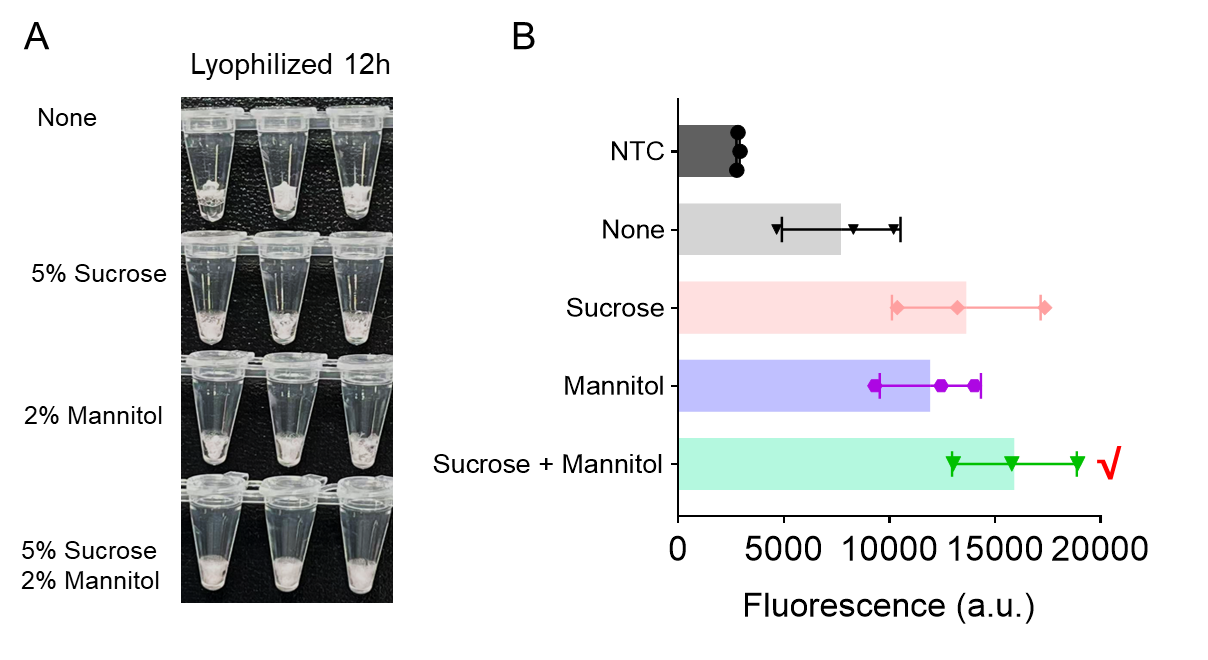


## Fig. S14. Optimization of lyoprotectants for lyophilized TEMPO reaction system toward point-of-care use.

(A) Photographs of the TEMPO reaction system after 12 h lyophilization using different lyoprotectants. The reaction mixtures were lyophilized for 12 h in the presence of various lyoprotectants as indicated. NTC denotes the condition without the addition of any lyoprotectants. (B) Fluorescence validation of lyophilized one-pot reaction systems prepared with different lyoprotectants. Lyophilized reactions were rehydrated and challenged with 1 fM target input. Fluorescence signals were recorded after 20 min of reaction, demonstrating that 5% (w/w) sucrose combined with 2% (w/w) mannitol provided the optimal protection and preserved the highest reaction performance. n = 3 technical replicates; error bars indicate mean ± s.d.


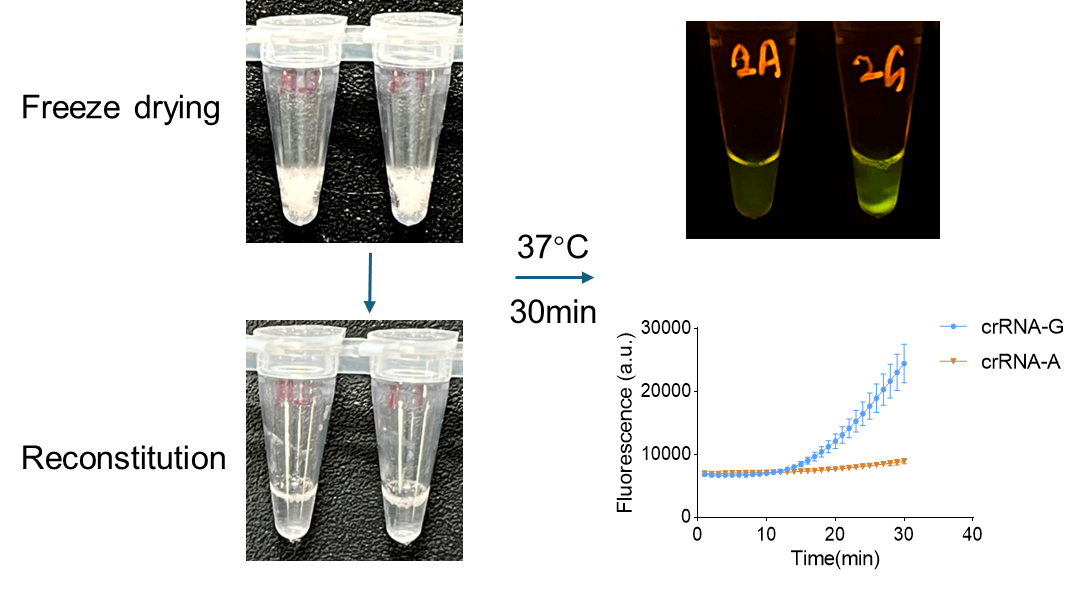


## Fig. S15. Tube-based TEMPO reactions for real-sample analysis.

Photographs of the lyophilized TEMPO reaction system pre-stored in tubes before and after reconstitution with real samples (left). Following rehydration, endpoint fluorescence images illustrate distinct signal outputs between samples (top right). Real-time fluorescence kinetics obtained from a fresh, non-lyophilized reaction system are shown as a control to confirm successful amplification and detection in real samples (bottom right).


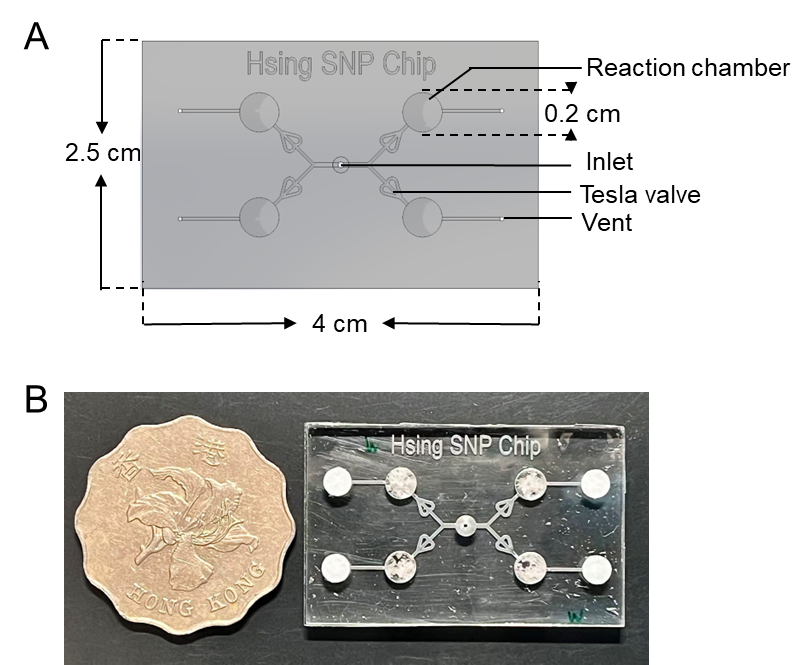


## Fig. S16. Design and validation of a dual-target microfluidic SNP chip

(A) Schematic design of the microfluidic SNP chip integrating two independent SNP targets within a four-channel architecture. Each target is addressed by two parallel reaction channels converging toward a central reaction chamber, enabling multiplexed and symmetric assay operation. (B) Photograph of the fully assembled SNP chip. A HKD 2 coin is shown alongside the device for size reference.


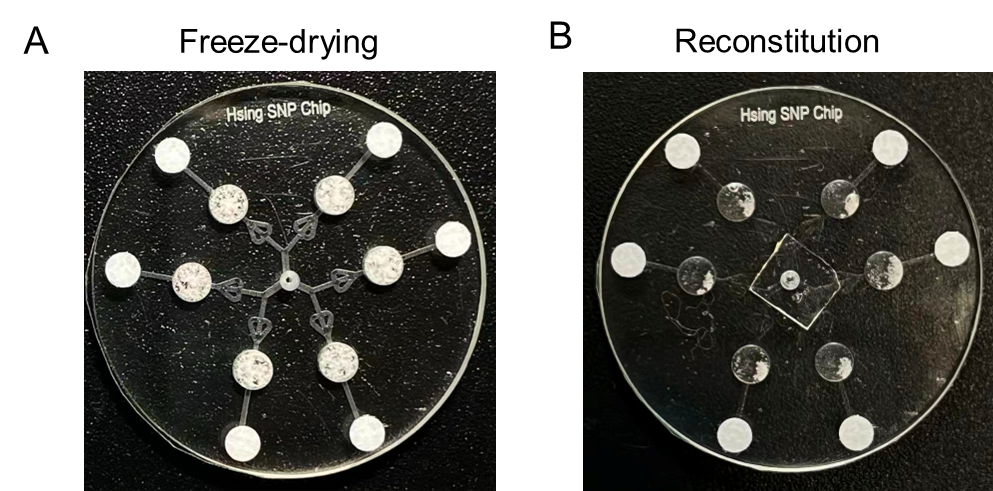


## Fig. S17. Lyophilization and reconstitution in microfluidic chip.

Photographs of the microfluidic SNP chip after on-chip lyophilization (A) and following reagent reconstitution by sample loading (B). Lyophilized reaction components were preserved within the reaction chambers and rehydrated prior to analysis, demonstrating the compatibility of the chip with on-chip reagent storage.


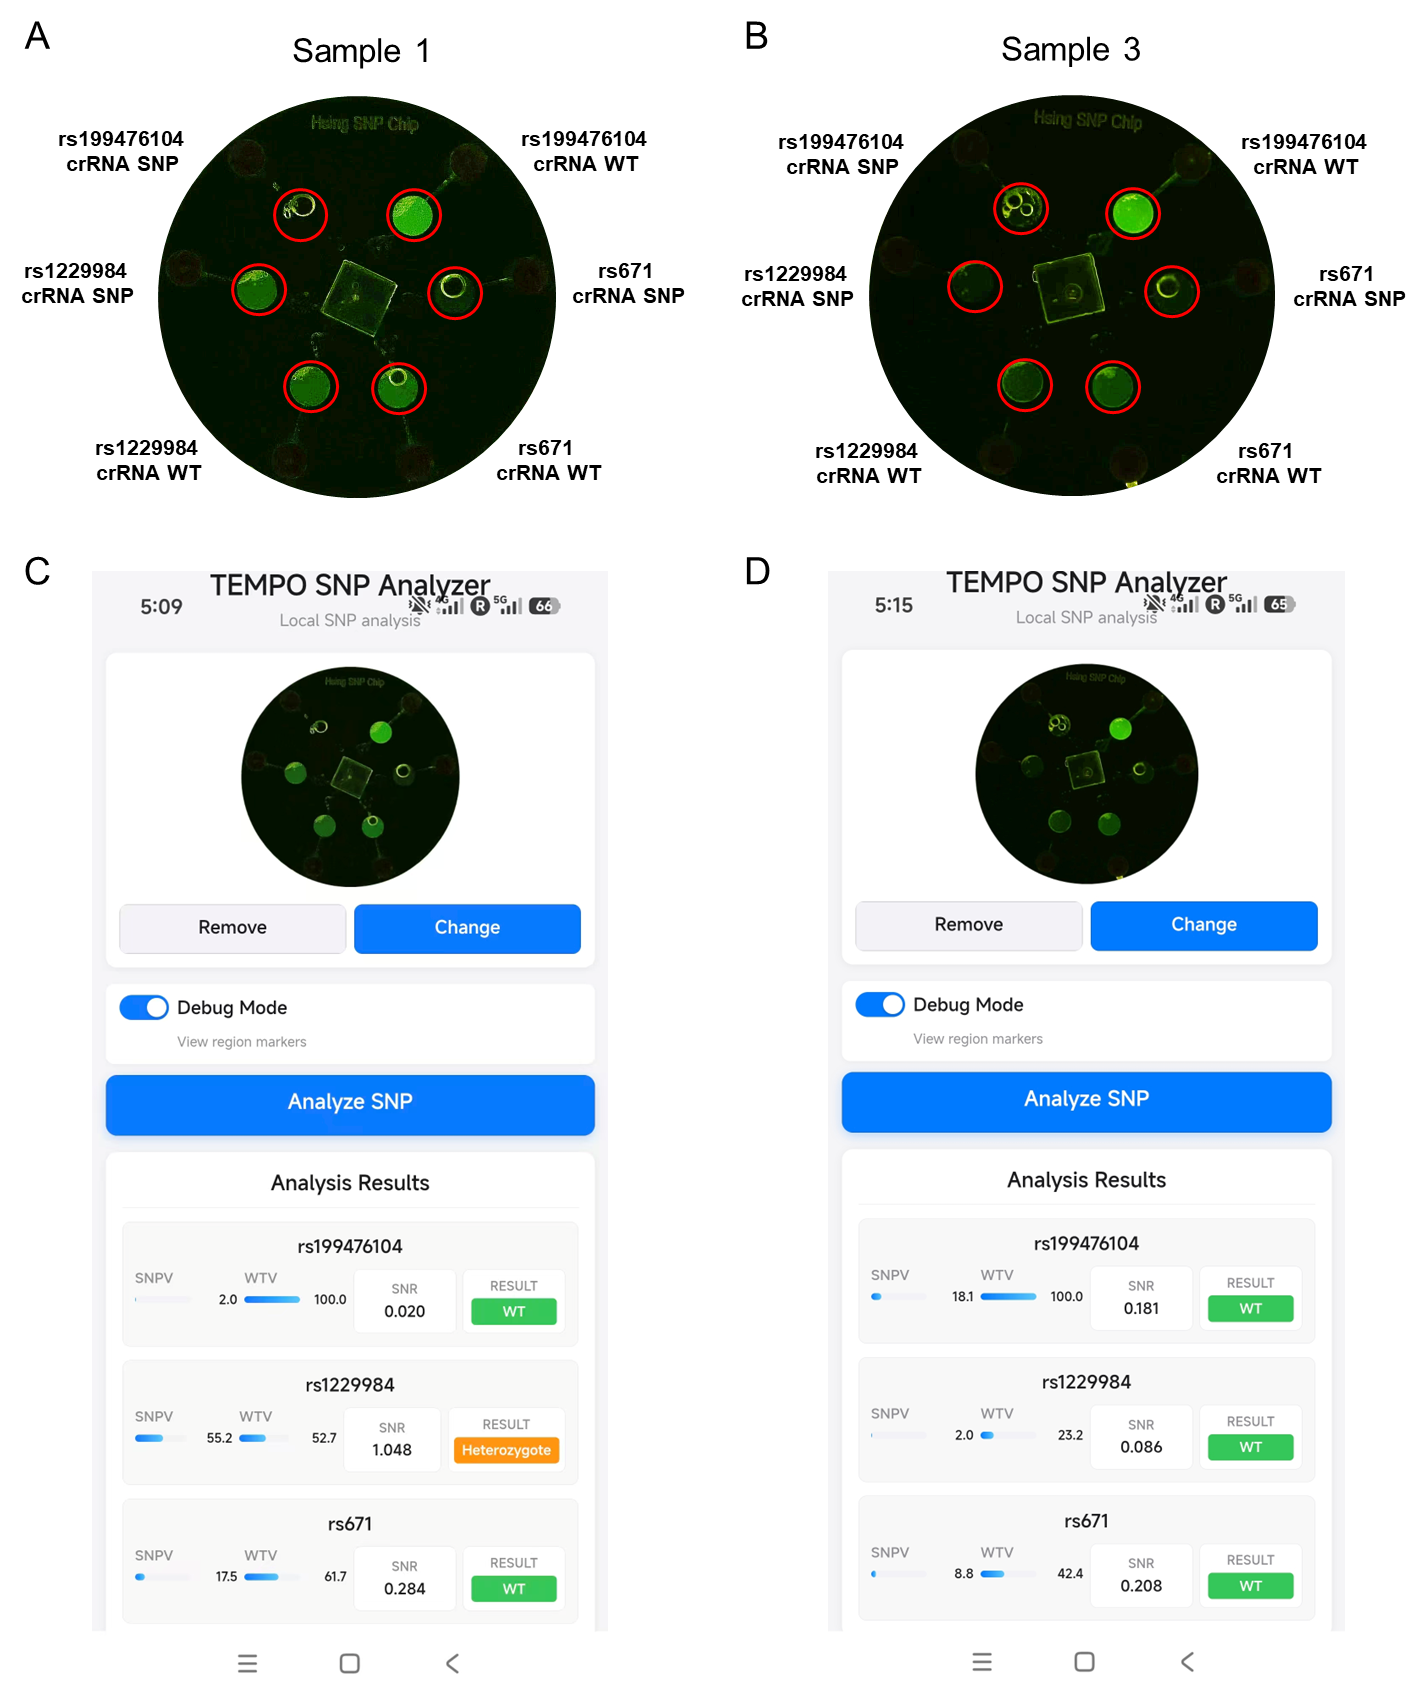


## Fig. S18. Microfluidic chip–based fluorescence readout for representative samples.

Representative fluorescence images of the microfluidic SNP chip obtained using sample 1 (A) and sample 3 (B) after a 30 min reaction. (C and D) Smartphone application–based endpoint SNP genotyping corresponding to the fluorescence images in (A) and (B). The mobile app automatically analyzed fluorescence intensities from individual reaction chambers and directly output genotype calls (WT, SNP, or heterozygous), enabling user-friendly, on-chip SNP discrimination.

## Table S1: Sequences used in this study.

| No. | Label | Sequence (5'to3') |
| --- | --- | --- |
| 1 | HIV-crRNA | UAAUUUCUACUAAGUGUAGAUUAUAAUAGCAACAGACAUA |
| 2 | HIV-crRNA-site2 | UAAUUUCUACUAAGUGUAGAUAAUAAUAGAUAUAAUAGCAA |
| 3 | HIV-FP1 | CACCTTAAGACAGCAGTACAAATGGCAGTAT |
| 4 | HIV-BP1 | TCTCTGCTGTCCCTGTAATAAACCCGAAAAT |
| 5 | HIV-FPP0-1 | TACAGTGCAGGGGAAAGAATAAAAGATATAATAG |
| 6 | HIV-FPP0 | TACAGTGCAGGGGAAAGAATAATAGATATAATAG |
| 7 | HIV-FPP1 | TACAGTGCAGGGGAAAGAATAATATATATAATAG |
| 8 | HIV-FPP2 | TACAGTGCAGGGGAAAGAATAATTGA TATAATAG |
| 9 | HIV-FPP3 | TACAGTGCAGGGGAAAGAATAATTTA TATAATAG |
| 10 | HIV-FPP2L-10 | AGGGGAAAGAATAATTGA TATAATAG |
| 11 | HIV-FPP2L-12 | GGGAAAGAATAATTGA TATAATAG |
| 12 | HIV-FPP2L-14 | GAAAGAATAATTGA TATAATAG |
| 13 | HIV-FPP2L-16 | AAGAATAATTGA TATAATAG |
| 14 | HIV-FPP2L-18 | GAATAATTGA TATAATAG |
| 15 | HIV-FP1-FAM | FAM-CACCTTAAGACAGCAGTACAAATGGCAGTAT |
| 16 | HIV-FPP2-FAM | FAM-TACAGTGCAGGGGAAAGAATAATTGATATAATAG |
| 17 | HIV-PCR-FP1 | GGGATCCCCTACAATCCCCA |
| 18 | HIV-PCR-BP1 | GCTTGCTCTCTTACCTGCCC |
| 19 | HIV-template-FP | GGGAAAGAATAATAGATATAATAGCAACAGACATACAAACTAAAGA |
| 20 | HIV-template-BP | TCTTTAGTTTGTATGTCTGTTGCTATTATATCTATTATTCTTTCCC |
| 21 | HIV-template-PAM-FP | GGGAAAGAATAATTTATATAATAGCAACAGACATACAAACTAAAGA |
| 22 | HIV-template-PAM-BP | TCTTTAGTTTGTATGTCTGTTGCTATTATATAAATTATTCTTTCCC |
| 23 | HIV-FPP-site2 | GGGGTACAGTGCAGGGGTTAGAATAATG |
| 24 | HIV-FPP-MUT-1 | TACAGTGCAGGGGAAAGAATAATTGCTATAATAG |
| 25 | HIV-FPP-MUT-2 | TACAGTGCAGGGGAAAGAATAATTGAGATAATAG |
| 26 | HIV-FPP-MUT-3 | TACAGTGCAGGGGAAAGAATAATTGATCTAATAG |
| 27 | HIV-FPP-MUT-4 | TACAGTGCAGGGGAAAGAATAATTGATAGAATAG |
| 28 | HIV-FPP-MUT-5 | TACAGTGCAGGGGAAAGAATAATTGATATCATAG |
| 29 | HIV DNA  (Built in puc57 plasmid) | CAGTTAAAGCAGCCTGTTGGTGGGCCAATGTCCGACAGGAATTTGGGATCCCCTACAATCCCCAAAGTCAAGGAGTAGTAGAATCTATGAATAAGGAATTAAAGAAAATCATAGGGCAGGTAAGAGAGCAAGCTGAACACCTTAAGACAGCAGTACAAATGGCAGTATTTATTCACAATTTTAAAAGAAAAGGGGGGATTGGGGGGTACAGTGCAGGGGAAAGAATAATAGATATAATAGCAACAGACATACAAACTAAAGAATTACAAAAACAAATTACAAAAATTCAAAATTTTCGGGTTTATTACAGGGACAGCAGAGACCCAATTTGGAAAGGACCAGCAAAACTACTCTGGAAAGGTGAAGGGGCAGTAGTAATACAAGACAATAGTGATATAAAAGTAGTACCAAGAAGAAAAGCAAAGATCATTAGGGATTATGGAAAACAGATGGCAGGTGATGATTGTGTGGCAGGTAGACAGGATGAGGATTAGAACATG |
| 30 | HIV RNA | CAGUUAAAGCAGCCUGUUGGUGGGCCAAUGUCCGACAGGAAUUUGGGAUCCCCUACAAUCCCCAAAGUCAAGGAGUAGUAGAAUCUAUGAAUAAGGAAUUAAAGAAAAUCAUAGGGCAGGUAAGAGAGCAAGCUGAACACCUUAAGACAGCAGUACAAAUGGCAGUAUUUAUUCACAAUUUUAAAAGAAAAGGGGGGAUUGGGGGGUACAGUGCAGGGGAAAGAAUAAUAGAUAUAAUAGCAACAGACAUACAAACUAAAGAAUUACAAAAACAAAUUACAAAAAUUCAAAAUUUUCGGGUUUAUUACAGGGACAGCAGAGACCCAAUUUGGAAAGGACCAGCAAAACUACUCUGGAAAGGUGAAGGGGCAGUAGUAAUACAAGACAAUAGUGAUAUAAAAGUAGUACCAAGAAGAAAAGCAAAGAUCAUUAGGGAUUAUGGAAAACAGAUGGCAGGUGAUGAUUGUGUGGCAGGUAGACAGGAUGAGGAUUAGAACAUGAUCCCAAUGGCGCG |
| 31 | RS199476104-crRNA-WT | UAAUUUCUACUAAGUGUAGAU CCAUCAUUCCCCCUAAAUAAAUU |
| 32 | RS199476104-crRNA-SNP | UAAUUUCUACUAAGUGUAGAU CCACCAUUCCCCCUAAAUAAAUU |
| 33 | RS199476104-crRNA-Site 2 | UAAUUUCUACUAAGUGUAGAU UUCAGAAUAAUAACACACCC |
| 34 | RS199476104-FP-primer | AGCCATCGCTGTAGTATATCCAAAGACAACCA |
| 35 | RS199476104-BP-primer | TAATGGGGTTTGTGGGGTTTTCTTCTAAGCC |
| 36 | RS199476104-FPP4-primer | AGCCATCGCTGTAGTATATCCAAAGATTACCA |
| 37 | RS199476104-FP-primer-S3 | AGCCATCGCTGTAGTATATCCAAAGTTTACCA |
| 38 | RS199476104-F-primer-S5 | AGCCATCGCTGTAGTATATCCAAAGTCTACCA |
| 39 | RS199476104-F-primer-S6 | AGCCATCGCTGTAGTATATCCAAAGACTACCA |
| 40 | RS199476104-F-primer-S7 | AGCCATCGCTGTAGTATATCCAAAGATAACCA |
| 41 | RS199476104-FPP2L-10 | GTAGTATATCCAAAGATTACCA |
| 42 | RS199476104-FPP2L-12 | AGTATATCCAAAGATTACCA |
| 43 | RS199476104-FPP2L-14 | TATATCCAAAGATTACCA |
| 44 | RS199476104-FPP2L-16 | TATCCAAAGATTACCA |
| 45 | RS199476104-FPP2L-18 | TCCAAAGATTACCA |
| 46 | RS199476104-FPP-site2 | ATTAAACCCATATAACCTCCCCCTTAATTCAGAA |
| 47 | RS199476104-FPP-MUT-1 | AGCCATCGCTGTAGTATATCCAAAGATTAACA |
| 48 | RS199476104-FPP-MUT-2 | AGCCATCGCTGTAGTATATCCAAAGATTACAA |
| 49 | RS199476104-FPP-MUT-3 | AGCCATCGCTGTAGTATATCCAAAGATTACCC |
| 50 | RS199476104-WT(*T)-DNA  (Built in puc57 plasmid) | ACTCACCAAGACCTCAACCCCTGACCCCCATGCCTCAGGATACTCCTCAATAGCCATCGCTGTAGTATATCCAAAGACAACCATCATTCCCCCTAAATAAATTAAAAAAACTATTAAACCCATATAACCTCCCCCAAAATTCAGAATAATAACACACCCGACCACACCGCTAACAATCAATACTAAACCCCCATAAATAGGAGAAGGCTTAGAAGAAAACCCCACAAACCCCATTACTAAA |
| 51 | RS199476104-SNP(*C)-DNA  (Built in puc57 plasmid) | ACTCACCAAGACCTCAACCCCTGACCCCCATGCCTCAGGATACTCCTCAATAGCCATCGCTGTAGTATATCCAAAGACAACCACCATTCCCCCTAAATAAATTAAAAAAACTATTAAACCCATATAACCTCCCCCAAAATTCAGAATAATAACACACCCGACCACACCGCTAACAATCAATACTAAACCCCCATAAATAGGAGAAGGCTTAGAAGAAAACCCCACAAACCCCATTACTAAA |
| 52 | RS1229984-crRNA-WT | UAAUUUCUACUAAGUGUAGAUUGUCGCACAGAUGACCACGUGGU |
| 53 | RS1229984-crRNA-SNP | UAAUUUCUACUAAGUGUAGAUUGUCACACAGAUGACCACGUGGU |
| 54 | RS1229984-FP1 | GGGATTAGTAGCAAAACCCTCAAATACATTT |
| 55 | RS1229984-R2 | CCAACACTCTCCACGATGCCGGCTGCCTCATGG |
| 56 | RS1229984-FPP-SubPam | TATTCTGTAGATGGTGGCTGTAGGATTCTGTC |
| 57 | RS1229984-FPP-Pam | TATTCTGTAGATGGTGGCTGTAGGTTTCTGTC |
| 58 | RS1229984-WT(*G)-DNA (Built in puc57 plasmid) | AGACTGAATAACCTTGGGGATAAACTGAATCTTTCATATTTAGGAATAGTAGGGATTAGTAGCAAAACCCTCAAATACATTTTAGAAACACAATTTCAGGAATTTGGGTATGTTAAATTCATCTAGTTACAATCTTTTCTGAATCTGAACAGCTTCTCTTTATTCTGTAGATGGTGGCTGTAGGAATCTGTCGCACAGATGACCACGTGGTTAGTGGCAACCTGGTGACCCCCCTTCCTGTGATTTTAGGCCATGAGGCAGCCGGCATCGTGGAGAGTGTTGGAGAAGGGGTGACTACAGTCAAACCAGGTACAGGATTCACACTCAGGGAACACGTGTGGTTCACCATCCAGGATTTCCCAGCCTGGATAAGGAAACCAAGGCAATGAGAGACG |
| 59 | RS1229984-SNP(*A)-DNA (Built in puc57 plasmid) | AGACTGAATAACCTTGGGGATAAACTGAATCTTTCATATTTAGGAATAGTAGGGATTAGTAGCAAAACCCTCAAATACATTTTAGAAACACAATTTCAGGAATTTGGGTATGTTAAATTCATCTAGTTACAATCTTTTCTGAATCTGAACAGCTTCTCTTTATTCTGTAGATGGTGGCTGTAGGAATCTGTCACACAGATGACCACGTGGTTAGTGGCAACCTGGTGACCCCCCTTCCTGTGATTTTAGGCCATGAGGCAGCCGGCATCGTGGAGAGTGTTGGAGAAGGGGTGACTACAGTCAAACCAGGTACAGGATTCACACTCAGGGAACACGTGTGGTTCACCATCCAGGATTTCCCAGCCTGGATAAGGAAACCAAGGCAATGAGAGACG |
| 60 | RS671-crRNA-WT | UAAUUUCUACUAAGUGUAGAUCACUGAAGUGAAAACUGUGAGUG |
| 61 | RS671-crRNA-SNP | UAAUUUCUACUAAGUGUAGAUCACUAAAGUGAAAACUGUGAGUG |
| 62 | RS671-FP1 | GAGTGATTTCTGCAATCTCGTTTCAAATTAC |
| 63 | RS671-BP1 | GCAGACCCTCAAGCCCCAACAGGCCCTGAGC |
| 64 | RS671-SubFPP | GAGTTGGGCGAGTACGGGCTGCAGGCTTACACT |
| 65 | RS671-2FPP1 | GAGTTGGGCGAGTACGGGCTGCAGGCTTACTCT |
| 66 | RS671-WT(*G)-DNA (Built in puc57 plasmid) | AGACTTTGGGGCAATACAGGGGGTCCTGGGAGTGTAACCCATAACCCCCAAGAGTGATTTCTGCAATCTCGTTTCAAATTACAGGGTCAACTGCTATGATGTGTTTGGAGCCCAGTCACCCTTTGGTGGCTACAAGATGTCGGGGAGTGGCCGGGAGTTGGGCGAGTACGGGCTGCAGGCATACACTGAAGTGAAAACTGTGAGTGTGGGACCTGCTGGGGGCTCAGGGCCTGTTGGGGCTTGAGGGTCTGCTGGTGGCTCGGAGCCTGCTGGGGGATTGGGGTCTGTTGGGGGCTCGGGGCCTGCCAGAGGTTCAGGACCTGCCGGGGACTCAGGGCCTGCTGGAAGTTCAGGACCTGCTGGGGATCAGGGCCTGCCAGGGATTTAGGGTCTGCTGGGCGGGCCACCT |
| 67 | RS671-SNP(*A)-DNA (Built in puc57 plasmid) | AGACTTTGGGGCAATACAGGGGGTCCTGGGAGTGTAACCCATAACCCCCAAGAGTGATTTCTGCAATCTCGTTTCAAATTACAGGGTCAACTGCTATGATGTGTTTGGAGCCCAGTCACCCTTTGGTGGCTACAAGATGTCGGGGAGTGGCCGGGAGTTGGGCGAGTACGGGCTGCAGGCATACACTAAAGTGAAAACTGTGAGTGTGGGACCTGCTGGGGGCTCAGGGCCTGTTGGGGCTTGAGGGTCTGCTGGTGGCTCGGAGCCTGCTGGGGGATTGGGGTCTGTTGGGGGCTCGGGGCCTGCCAGAGGTTCAGGACCTGCCGGGGACTCAGGGCCTGCTGGAAGTTCAGGACCTGCTGGGGATCAGGGCCTGCCAGGGATTTAGGGTCTGCTGGGCGGGCCACCT |
| 68 | Reporter | FAM-TTTTTT-BHQ1 |

## Table S2. Composition of the TEMPO system.

| Component | Conc | Final conc | Volume |
| --- | --- | --- | --- |
| LbCas12a* | 1 µM | 25 nM | 0.5 µL |
| crRNA | 2 µM | 50 nM | 0.5 µL |
| Reporter | 10 µM | 400 nM | 0.8 µL |
| NEB buffer2.1 | - | - | 0.5 µL |
| Rehydration buffer A | - | - | 7.5 µL |
| Primer-FP | 10 µM | 125 nM | 0.25 µL |
| Primer-FPP | 10 µM | 125 nM | 0.25 µL |
| Primer-BP | 10 µM | 250 nM | 0.5 µL |
| DEPC H2O | - | - | 3.8 µL |
| Buffer B (MgOAc)** | 280 mM | 19.6 mM | 1.4 µL |
| Target | - | - | 4 µL |
| Total |  |  | 20 µL |

* The Cas12a–crRNA complex was preincubated at room temperature for 5 min prior to mixing with other reagents.

** MgOAc is added last to initiate amplification.

1. Final concentrations were calculated based on a total reaction volume of 20 µL.

## Table S3. Lyophilization formulation of the TEMPO system.

| Component | Conc | Final conc | Volume |
| --- | --- | --- | --- |
| LbCas12a* | 1 µM | 50 nM | 1 µL |
| crRNA | 2 µM | 100 nM | 1 µL |
| Reporter | 10 µM | 800 nM | 1.6 µL |
| NEB buffer2.1 | - | - | 0.5 µL |
| Primer-FP | 10 µM | 125 nM | 0.25 µL |
| Primer-FPP | 10 µM | 125 nM | 0.25 µL |
| Primer-BP | 10 µM | 250 nM | 0.5 µL |
| DEPC H2O* | - | - | 10.9 µL |
| Sucrose | 50% | 5% | 2 µL |
| Mannitol | 20% | 2% | 2 µL |
| Total |  |  | 20 µL |

* The Cas12a–crRNA complex was preincubated at room temperature for 5 min prior to mixing with other reagents.

** Reconstitute RPA reagents with DEPC H₂O.

1. Final concentrations were calculated based on a total reaction volume of 20 µL.
2. Lyophilize for 12 hours in the benchtop freeze dryer according to the above formulation.
3. The resuspension solution contains the Buffer A reduction solution provided in the kit, B buffer (MgOAc), and the sample.

## Table S4. TEMPO-based detection results for 20 human SNP samples.

| Sample | rs1229984 | rs671 | rs199476104 |  |
| --- | --- | --- | --- | --- |
| 1 | 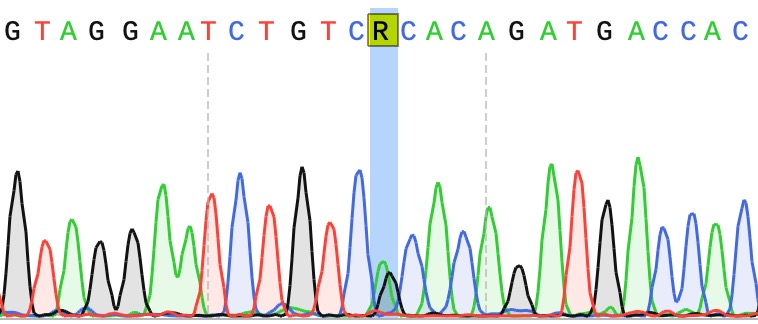 | 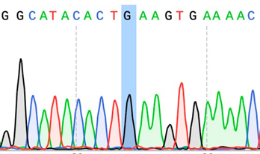 | 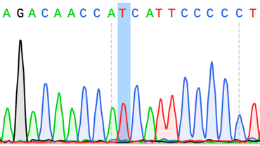 |  |
| 2 | 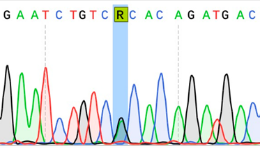 | 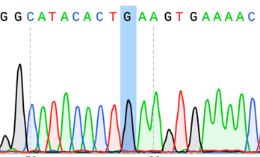 | 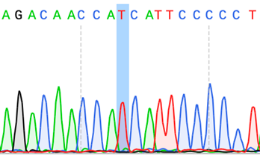 |  |
| 3 | 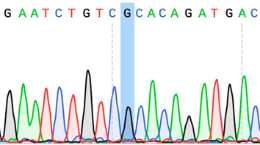 | 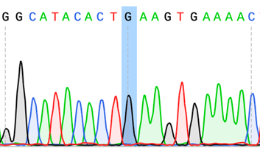 | 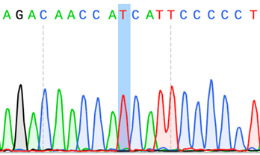 |  |
| 4 | 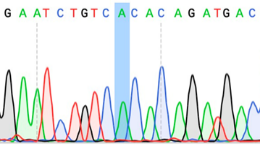 | 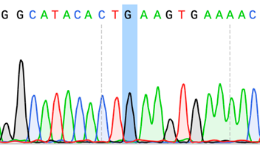 | 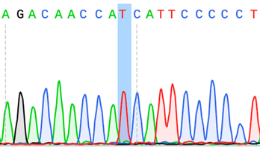 |  |
| 5 | 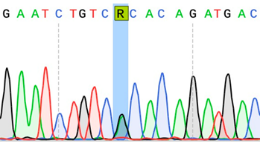 | 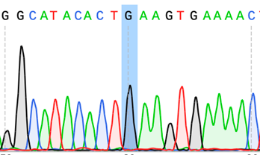 | 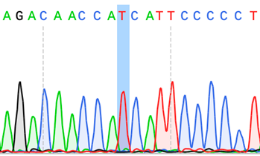 |  |
| 6 | 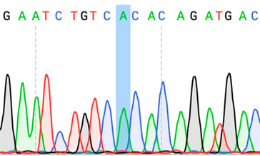 | 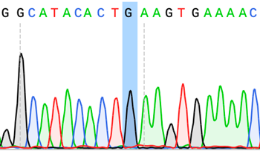 | 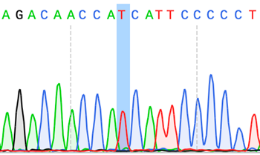 |  |
| 7 | 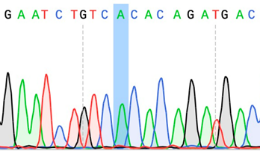 | 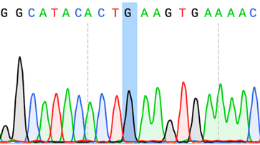 | 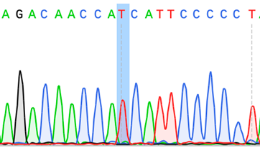 |  |
| 8 | 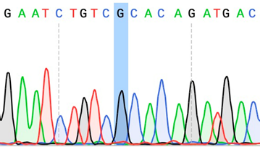 | 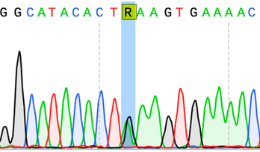 | 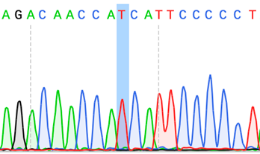 |  |
| 9 | 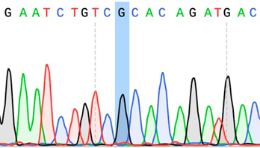 | 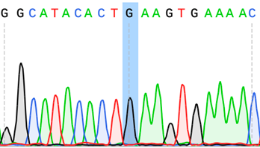 | 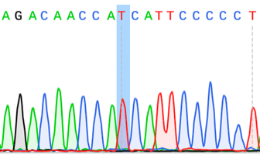 |  |
| 10 | 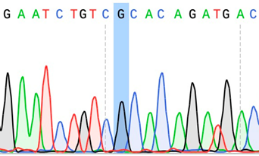 | 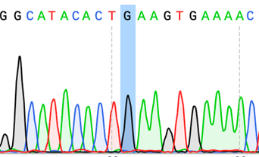 | 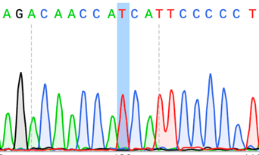 |  |
| 11 | 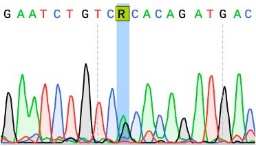 | 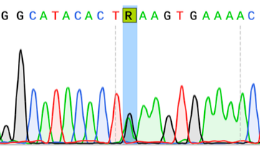 | 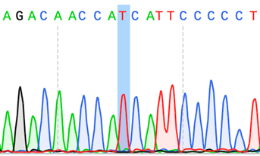 |  |
| 12 | 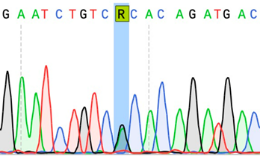 | 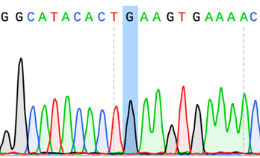 | 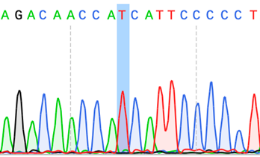 |  |
| 13 | 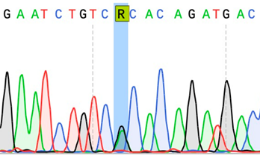 | 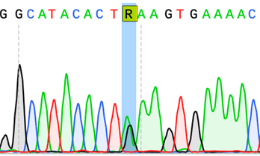 | 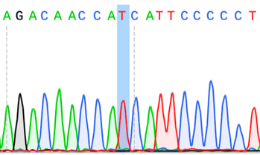 |  |
| 14 | 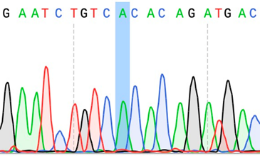 | 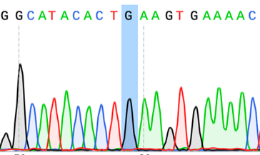 | 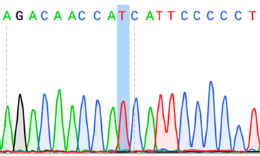 |  |
| 15 | 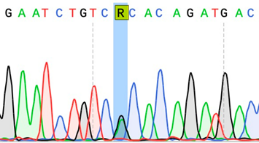 | 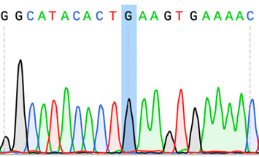 | 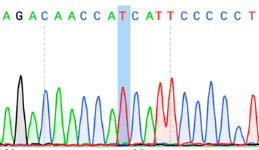 |  |
| 16 | 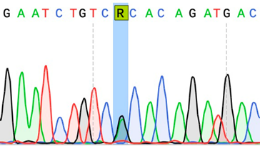 | 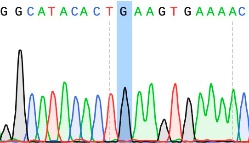 | 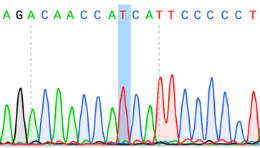 |  |
| 17 | 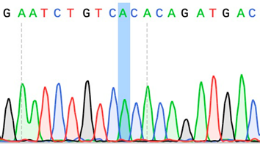 | 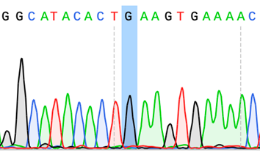 | 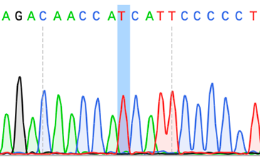 |  |
| 18 | 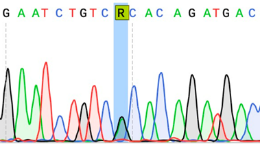 | 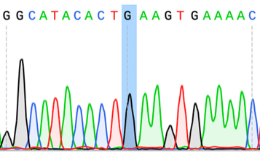 | 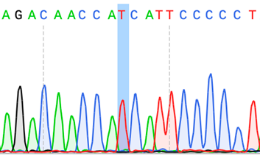 |  |
| 19 | 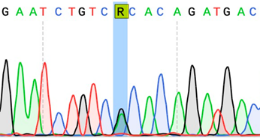 | 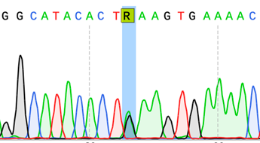 | 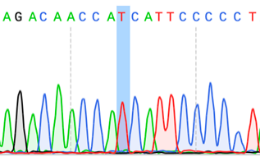 |  |
| 20 | 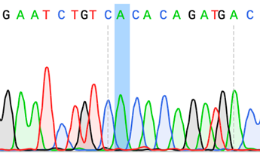 | 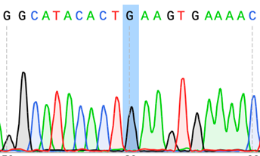 | 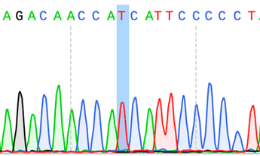 |  |
|  |  |  |  |  |

## Supplementary Note 1: Ordinary Differential Equations (ODEs)

Below is a comprehensive summary of all reactants, products, and rate coefficients used in the reaction steps and ordinary differential equations (ODEs) describing the one-pot RPA–CRISPR/Cas system. In this model, the engineered forward primer (FPP) produces a distinct antisense strand (AT2), introducing an additional amplification pathway. The system encompasses the original RPA reactions involving FP, BP, ST, AT, and D, as well as the extended network incorporating FPP, ST2, AT2, and the newly formed double-stranded DNA D2 (ST2·AT2). The Cas protein–crRNA complex (C) can bind either D or D2 to form CD or CD2, respectively. Upon binding, CD and CD2 acquire trans-cleavage activity and catalyze reporter (R) degradation to generate the fluorescence signal (F), which is described using a Michaelis–Menten kinetic framework. In addition, activated Cas–crRNA–dsDNA complexes can also cleave primers (FP, BP, FPP), since they are single-stranded DNA substrates, albeit with lower catalytic efficiency than for the reporter. The following list is derived from the full set of reaction steps and the corresponding ODE system defined earlier.

Reactants and Products

The following table lists each reaction, its reactants, products, and the associated rate coefficient.

| **No.** | **Reaction** | **Rate Expression** | **Notes** |
| --- | --- | --- | --- |
| 1 | FP + D → FP·D | r1 = k1 * FP * D |  |
| 2 | FP·D → ST + D | r1e = k1_ext * FP_D |  |
| 3 | BP + D → BP·D | r2 = k2 * BP * D |  |
| 4 | BP·D → AT + D | r2e = k2_ext * BP_D |  |
| 5 | BP + ST → BP·ST | r3 = k3 * BP * ST |  |
| 6 | BP·ST → D | r3e = k3_ext * BP_ST |  |
| 7 | FP + AT → FP·AT | r4 = k4 * FP * AT |  |
| 8 | FP·AT → D | r4e = k4_ext * FP_AT |  |
| 9 | ST + AT → D | r5 = k5 * ST * AT |  |
| 10 | FPP + D → FPP·D | r6 = k6 * FPP * D |  |
| 11 | FPP·D → ST2 + D | r6e = k6_ext * FPP_D |  |
| 12 | FPP + AT → FPP·AT | r7 = k7 * FPP * AT |  |
| 13 | FPP·AT → ST2 + AT | r7e = k7_ext * FPP_AT |  |
| 14 | BP + ST2 → D2 | r8 = k8 * BP * ST2 |  |
| 15 | BP + D2 → BP·D2 | r9 = k9 * BP * D2 |  |
| 16 | BP·D2 → AT2 + D2 | r9e = k9_ext * BP_D2 |  |
| 17 | FPP + D2 → FPP·D2 | r10 = k10 * FPP * D2 |  |
| 18 | FPP·D2 → ST2 + D2 | r10e = k10_ext * FPP_D2 |  |
| 19 | FPP + AT2 → D2 | r11 = k11 * FPP * AT2 |  |
| 20 | ST2 + AT2 → D2 | r12 = k12 * ST2 * AT2 |  |
| 21 | C + D → CD | r13 = k13 * C * D | k13 << k14 |
| 22 | C + D2 → CD2 | r14 = k14 * C * D2 | k14 >> k13 |
| 23 | CD + R → CD + F | V1 = (kcat1 * CD * R) / (Km1 + R) |  |
| 24 | CD2 + R → CD2 + F | V2 = (kcat2 * CD2 * R) / (Km2 + R) | V2 >> V1 |
| 25 | CD + FP → CD + FP1 | V3 = (kcat3 * CD * FP) / (Km3 + FP) |  |
| 26 | CD + BP → CD + BP1 | V4 = (kcat3 * CD * BP) / (Km3 + BP) |  |
| 27 | CD + FPP → CD + FPP1 | V5 = (kcat3 * CD * FPP) / (Km3 + FPP) |  |
| 28 | CD2 + FP → CD2 + FP1 | V6 = (kcat4 * CD2 * FP) / (Km4 + FP) |  |
| 29 | CD2 + BP → CD2 + BP1 | V7 = (kcat4 * CD2 * BP) / (Km4 + BP) |  |
| 30 | CD2 + FPP → CD2 + FPP1 | V8 = (kcat4 * CD2 * FPP) / (Km4 + FPP) |  |

Kcat3=kcat1 / 2 km3=km1 * 2

Kcat4=kcat2 / 2 km4=km2 * 2

Species (Reactants and Products)

The species included in the reaction system and ODEs are:

**•** FP: Forward primer (original, fully complementary to AT).

• BP: Backward primer (complementary to ST).

• ST: Sense template (single-stranded DNA).

• AT: Anti-sense template (single-stranded DNA, complementary to ST).

• D: Original double-stranded DNA (ST·AT).

• FPP: Engineered forward primer (designed with mismatches relative to AT).

• ST2: Extended sense template produced by FPP binding to D or AT.

• AT2: Extended anti-sense template produced by BP binding to D2.

• D2: New double-stranded DNA (ST2·AT2, produced via FPP and BP reactions).

• C: Cas12a–crRNA protein complex (free form).

• CD: Complex of Cas12a–crRNA bound to D (no PAM, weak activation).

• CD2: Complex of Cas12a–crRNA bound to D2 (with PAM, strong activation).

• R: DNA reporter molecule (short ssDNA probe labeled for fluorescence).

• F: Fluorescence signal (produced upon reporter cleavage).

Rate Coefficients

The rate coefficients used in the ODE model (units: μM⁻¹·s⁻¹ for bimolecular binding, s⁻¹ for catalytic turnover) are:

**•** k₁: FP binding to D (FP + D → ST + D).

• k₂: BP binding to D (BP + D → AT + D).

• k₃: BP binding to ST (BP + ST → D).

• k₄: FP binding to AT (FP + AT → D).

• k₅: ST + AT hybridization (ST + AT → D).

• k₆: FPP binding to D (FPP + D → ST2 + D).

• k₇: FPP binding to AT (FPP + AT → ST2 + AT).

• k₈: BP binding to ST2 (BP + ST2 → D2).

• k₉: BP extension on D2 (BP + D2 → AT2 + D2).

• k₁₀: FPP binding to D2 (FPP + D2 → ST2 + D2).

• k₁₁: FPP extension on AT2 (FPP + AT2 → D2).

• k₁₂: ST2 + AT2 hybridization (ST2 + AT2 → D2).

• k₁₃: Cas12a binding to D (C + D → CD, weak binding, no PAM).

• k₁₄: Cas12a binding to D2 (C + D2 → CD2, strong binding, PAM-dependent).

Michaelis–Menten catalytic parameters:

- **kcat₁, Km₁**: Catalytic turnover and Michaelis constant for reporter cleavage by CD.
- **kcat₂, Km₂**: Catalytic turnover and Michaelis constant for reporter cleavage by CD2 (≫ CD).
- **kcat₃, Km₃**: Catalytic turnover and Michaelis constant for primer digestion by CD.
- **kcat₄, Km₄**: Catalytic turnover and Michaelis constant for primer digestion by CD2.

ODE System

This document summarizes the ODE system describing the double-track RPA–CRISPR/Cas system, including all species, reactions, and Michaelis–Menten catalytic terms.

| Species | Differential Equation | Explanation |
| --- | --- | --- |
| FP (Forward primer) | d[FP]/dt = -k1[FP][D] - k4[FP][AT] - V3 - V6 | FP is consumed in reactions 1, 4, and by Cas-mediated cleavage (V3, V6). |
| BP (Backward primer) | d[BP]/dt = -k2[BP][D] - k3[BP][ST] - k8[BP][ST2] - k9[BP][D2] - V4 - V7 | BP is consumed in reactions 2, 3, 8, 9, and by Cas-mediated cleavage (V4, V7). |
| FPP (Engineered forward primer) | d[FPP]/dt = -k6[FPP][D] - k7[FPP][AT] - k10[FPP][D2] - k11[FPP][AT2] - V5 - V8 | FPP is consumed in reactions 6, 7, 10, 11, and by Cas-mediated cleavage (V5, V8). |
| ST (Sense template) | d[ST]/dt = +k1[FP][D] - k3[BP][ST] - k5[ST][AT] | ST is produced in reaction 1 and consumed in reactions 3, 5. |
| AT (Anti-sense template) | d[AT]/dt = +k2[BP][D] - k4[FP][AT] - k5[ST][AT] | AT is produced in reaction 2 and consumed in reactions 4, 5. |
| ST2 (Extended sense template) | d[ST2]/dt = +k6[FPP][D] + k7[FPP][AT] + k10[FPP][D2] - k8[BP][ST2] - k12[ST2][AT2] | ST2 is produced in reactions 6, 7, 10 and consumed in reactions 8, 12. |
| AT2 (Extended anti-sense template) | d[AT2]/dt = +k9[BP][D2] - k11[FPP][AT2] - k12[ST2][AT2] | AT2 is produced in reaction 9 and consumed in reactions 11, 12. |
| D (Original dsDNA) | d[D]/dt = +k3[BP][ST] + k4[FP][AT] + k5[ST][AT] - k13[C][D] | D is produced in reactions 3–5 and consumed by Cas binding (reaction 13). |
| D2 (New dsDNA) | d[D2]/dt = +k8[BP][ST2] + k11[FPP][AT2] + k12[ST2][AT2] - k14[C][D2] | D2 is produced in reactions 8, 11, 12 and consumed by Cas binding (reaction 14). |
| C (Cas12a–crRNA) | d[C]/dt = -k13[C][D] - k14[C][D2] | C is consumed by binding D and D2. |
| CD (Cas bound to D) | d[CD]/dt = +k13[C][D] | CD is produced in reaction 13. |
| CD2 (Cas bound to D2) | d[CD2]/dt = +k14[C][D2] | CD2 is produced in reaction 14. |
| R (Reporter) | d[R]/dt = -V1 - V2 | Reporter is consumed by Cas-mediated cleavage (V1, V2). |
| F (Fluorescence) | d[F]/dt = +V1 + V2 | Fluorescence is generated by Cas-mediated cleavage of reporter. |

Catalytic Terms (Michaelis–Menten kinetics)

V1 = (kcat1 * [CD] * [R]) / (Km1 + [R]) (Reporter cleavage by CD)
V2 = (kcat2 * [CD2] * [R]) / (Km2 + [R]) (Reporter cleavage by CD2)
V3 = (kcat3 * [CD] * [FP]) / (Km3 + [FP]) (FP cleavage by CD)
V4 = (kcat3 * [CD] * [BP]) / (Km3 + [BP]) (BP cleavage by CD)
V5 = (kcat3 * [CD] * [FPP]) / (Km3 + [FPP]) (FPP cleavage by CD)
V6 = (kcat4 * [CD2] * [FP]) / (Km4 + [FP]) (FP cleavage by CD2)
V7 = (kcat4 * [CD2] * [BP]) / (Km4 + [BP]) (BP cleavage by CD2)
V8 = (kcat4 * [CD2] * [FPP]) / (Km4 + [FPP]) (FPP cleavage by CD2)

## References

1. Huyke, D. A. *et al.* Enzyme Kinetics and Detector Sensitivity Determine Limits of Detection of Amplification-Free CRISPR-Cas12 and CRISPR-Cas13 Diagnostics. *Anal. Chem.* **94**, 9826–9834 (2022).
